# Supplementary material
Source: Springer Nature journal article supplement (https://www.springermedizin.de/resource/supplementary/12943_2011_902_MOESM6_ESM.pdf/9551952)

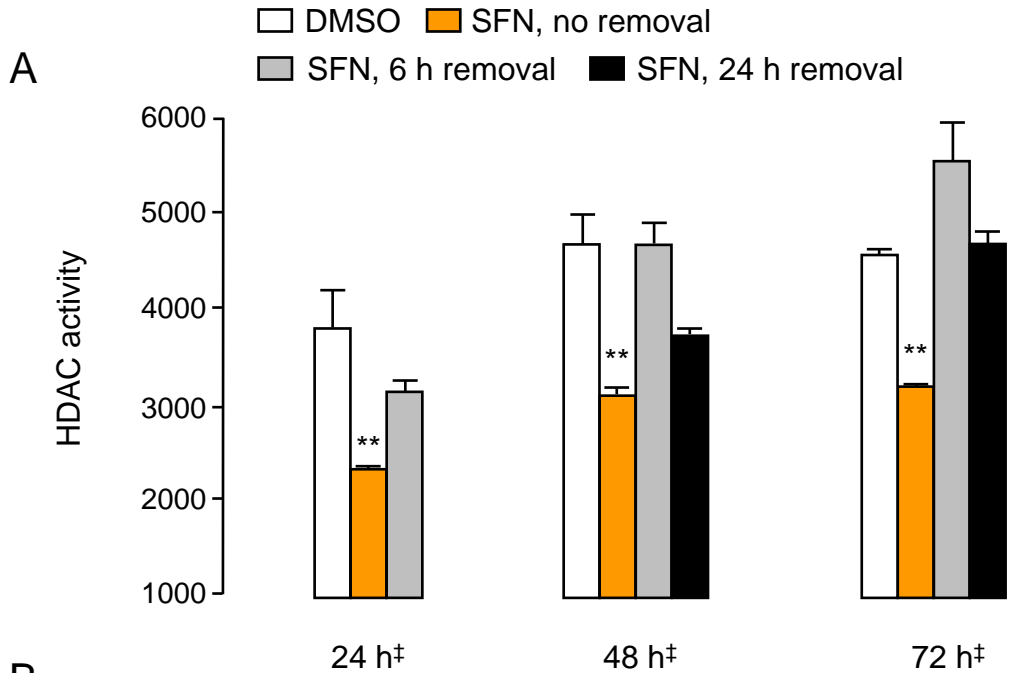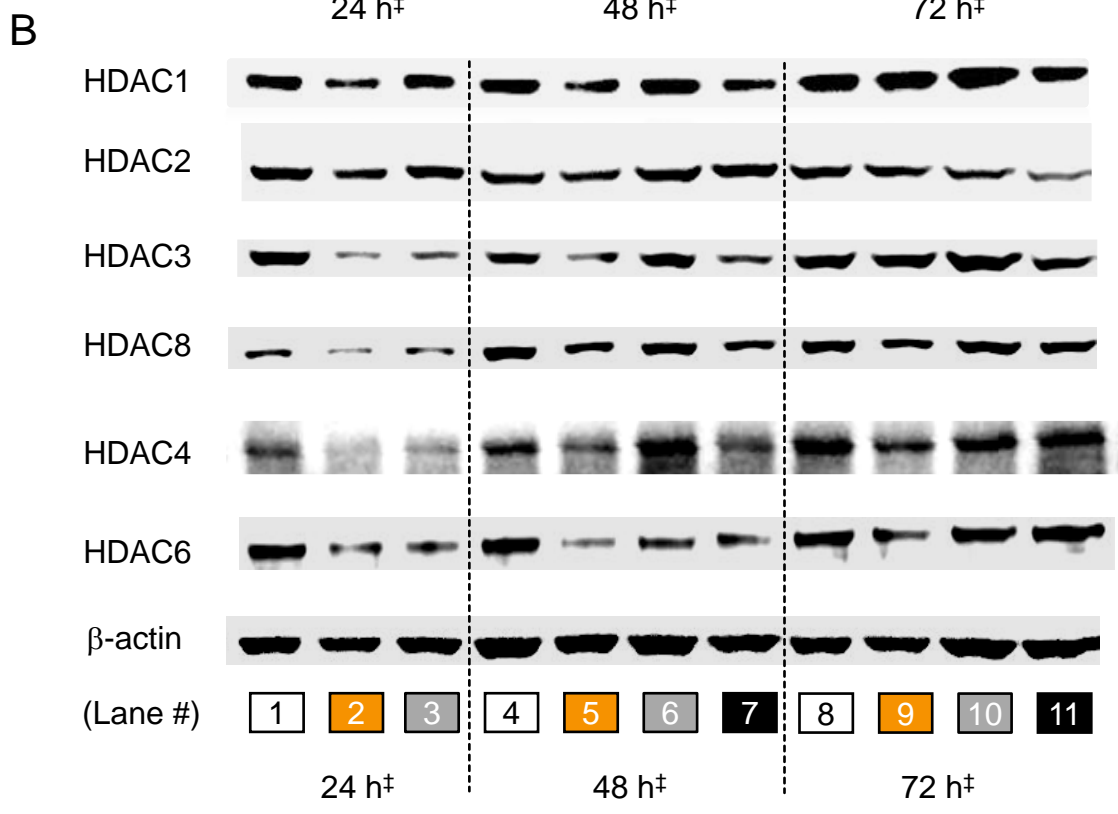

<sup>‡</sup>Time cells were harvested after start of treatment

Supplement: MOESM6 [file 9551952]
